# Supplementary material for: Deamidation disrupts native and transient contacts to weaken the interaction between UBC13 and RING-finger E3 ligases
Source: eLife. 2019 Oct 22;8:e49223. doi: 10.7554/eLife.49223 (PMC6874479; doi:10.7554/eLife.49223)
Supplement: Figure 1—source data 2. [file elife-49223-fig1-data2.xls]

## Sheet: csp-final(1)
1	0
2	0
3	0
4	0
5	0
6	0
7	0
8	0.163518
9	0.100424
10	0.0553263
11	0.36563
12	0.120221
13	0.01
14	0.159933
15	0.1703
16	0.131529
17	0.0232594
18	0.133462
19	0
20	0.0905539
21	0
22	0.021095
23	0.035
24	0.0704557
25	0.0633246
26	0.037054
27	0
28	0.0198494
29	0.0260192
30	0.0304138
31	0.0430116
32	0.00806226
33	0.0570088
34	0.103175
35	0.147763
36	0.049163
37	0.0240832
38	0.0190263
39	0.0411947
40	0.00447214
41	0.0111803
42	0
43	0
44	0.0138924
45	0.00223607
46	0
47	0.0116619
48	0.00707107
49	0.00632456
50	0.00583095
51	0.010198
52	0.00781025
53	0
54	0.0351141
55	0.0670298
56	0.109225
57	0.022561
58	0.128016
59	0
60	0
61	0.00905539
62	0.0950842
63	0
64	0.0756108
65	0.155824
66	0.076531
67	0
68	0.0345254
69	0.0450444
70	0.0181108
71	0
72	0.0161245
73	0.00806226
74	0.0114018
75	0.00921954
76	0.0282843
77	0
78	0
79	0.00921954
80	0.0186011
81	0.0512445
82	0.00583095
83	0.0380132
84	0.0133417
85	0.005
86	0
87	0
88	0.136059
89	0.0123693
90	0.0573847
91	0.052
92	0.0500899
93	0.010198
94	0.008544
95	0.125196
96	0.232215
97	0
98	0.659513
99	0.422043
100	0.374638
101	0.25334
102	0.0464004
103	0.0664831
104	0.0141421
105	0.034
106	0.0145602
107	0.0150333
108	0.0194165
109	0.0152315
110	0.0480937
111	0.046
112	0.0102956
113	0.0144222
114	0.00316228
115	0
116	0.021587
117	0
118	0.0420476
119	0.0218403
120	0
121	0.026
122	0.0264764
123	0
124	0
125	0.115039
126	0.0240208
127	0.0280179
128	0.0180278
129	0.00894427
130	0.0823893
131	0.00565685
132	0.00806226
133	0.00282843
134	0.0180278
135	0.00608276
136	0.0230217
137	0
138	0.0219545
139	0.00223607
140	0
141	0.0171172
142	0.00640312
143	0.0123693
144	0
145	0.00509902
146	0.00921954
147	0.0114018
148	0.0291548
149	0.003
150	0
151	0
152	0.00223607
res num	csp
