# Supplementary material for: Deamidation disrupts native and transient contacts to weaken the interaction between UBC13 and RING-finger E3 ligases
Source: eLife. 2019 Oct 22;8:e49223. doi: 10.7554/eLife.49223 (PMC6874479; doi:10.7554/eLife.49223)
Supplement: Figure 4—source data 1. [file elife-49223-fig4-data1.xlsx]

## Sheet: Sheet1
Salt_bridge	Mean	Std. Error of Mean
R14 – E69 (UBC13)	47.9	8.9
R14 – E69 (dUBC13)	30.7	6.9
R14 – E100 (dUBC13)	40.6	10.8
