# Supplementary material for: Deamidation disrupts native and transient contacts to weaken the interaction between UBC13 and RING-finger E3 ligases
Source: eLife. 2019 Oct 22;8:e49223. doi: 10.7554/eLife.49223 (PMC6874479; doi:10.7554/eLife.49223)
Supplement: Figure 9—source data 1. [file elife-49223-fig9-data1.xls]

## Sheet: csp-rnf38
1	0
2	0
3	0
4	0
5	0
6	0
7	0
8	0.274046
9	0.170801
10	0.129314
11	0.439645
12	0.133304
13	0.230139
14	0.704205
15	0.0948103
16	0.0692604
17	0.0541479
18	0.0296142
19	0
20	0.0986154
21	0
22	0.0308707
23	0.0567539
24	0.115261
25	0.0516624
26	0.113071
27	0
28	0.0128062
29	0.122801
30	0.101124
31	0.0586686
32	0.0114018
33	0.259002
34	0.0353553
35	0.284113
36	0.063561
37	0.0165529
38	0.0363456
39	0.0496488
40	0.0178045
41	0.0130384
42	0
43	0
44	0.006
45	0.0272947
46	0
47	0.00632456
48	0.00223607
49	0.00360555
50	0.0230868
51	0.0670075
52	0.0180278
53	0.0192354
54	0.0192354
55	0.111072
56	0.169012
57	0.0581378
58	0.287842
59	0
60	0
61	0.142864
62	0.235468
63	0
64	0.234525
65	0.597101
66	0.108227
67	0
68	0.138177
69	0.0232594
70	0.0711126
71	0.0199249
72	0.0541295
73	0.018868
74	0.0072111
75	0.0200998
76	0.00632456
77	0.0198494
78	0
79	0.0453982
80	0.0933435
81	0.0206155
82	0.0251794
83	0.0300832
84	0.0260768
85	0.00583095
86	0
87	0.0950368
88	0.0143178
89	0.00424264
90	0.0750733
91	0.0864002
92	0.00948683
93	0.135713
94	0.0612944
95	0.351251
96	0.233071
97	0
98	0.342498
99	0.45204
100	0.466024
101	0.225719
102	0.254637
103	0.0969381
104	0.034176
105	0.0609262
106	0.0457056
107	0.0131529
108	0.0134536
109	0.0161555
110	0.008544
111	0.037054
112	0.00707107
113	0.0190263
114	0.00806226
115	0
116	0.00538516
117	0
118	0.0410122
119	0.0274591
120	0
121	0.00948683
122	0.0133417
123	0
124	0
125	0.0839345
126	0.0705762
127	0.00509902
128	0.0190263
129	0.0111803
130	0.038
131	0.0067082
132	0.0300666
133	0.0280713
134	0.0151327
135	0.00447214
136	0
137	0.00412311
138	0.0211896
139	0.0196977
140	0.020025
141	0.0110454
142	0.005
143	0.0200998
144	0
145	0
146	0.00360555
147	0.007
148	0.00608276
149	0.0210238
150	0
151	0
152	0.0110454
res no	csp
