# Supplementary material for: Deamidation disrupts native and transient contacts to weaken the interaction between UBC13 and RING-finger E3 ligases
Source: eLife. 2019 Oct 22;8:e49223. doi: 10.7554/eLife.49223 (PMC6874479; doi:10.7554/eLife.49223)
Supplement: Figure 9—source data 2. [file elife-49223-fig9-data2.xls]

## Sheet: csp-rnf38
1	0
2	0
3	0
4	0
5	0
6	0
7	0
8	0.101272
9	0.137317
10	0.120009
11	0.370941
12	0.00538516
13	0.147105
14	0.0490918
15	0.0720139
16	0.166301
17	0.0117047
18	0.0142127
19	0
20	0.185529
21	0
22	0.022
23	0.0474131
24	0.0317648
25	0.0250599
26	0.00806226
27	0
28	0.0329848
29	0.0480833
30	0.0784474
31	0.0374833
32	0.0120416
33	0.14359
34	0.0490918
35	0.19321
36	0.0238537
37	0.0390512
38	0.0156525
39	0.0237065
40	0.00806226
41	0.0138924
42	0
43	0
44	0.0215407
45	0.0202485
46	0
47	0.0323883
48	0.0106301
49	0.048
50	0.005
51	0.0164012
52	0.0145602
53	0.0140357
54	0.0134536
55	0.091
56	0.0830542
57	0.0152315
58	0.167487
59	0
60	0
61	0.0790759
62	0.124326
63	0
64	0.233324
65	0.449111
66	0.095483
76	0
68	0.136825
69	0.0114018
70	0.0410488
71	0.00412311
72	0.0241661
73	0.0497393
74	0.00565685
75	0.003
76	0.025807
77	0.00640312
78	0
79	0.0963328
80	0.0777817
81	0.0327567
82	0.0299666
83	0.0475184
84	0.0347131
85	0.00806226
86	0
87	0.108116
88	0.0320624
89	0.0116619
90	0.086406
91	0.0702282
92	0.0174929
93	0.10002
94	0.0672681
95	0.340852
96	0.139778
97	0
98	0.293777
99	0.176777
100	0.0774661
101	0.0905539
102	0.192762
103	0.28457
104	0.0181108
105	0.0611882
106	0.0338378
107	0.0348281
108	0.0751864
109	0.0243311
110	0.0810555
111	0.0916624
112	0.0351283
113	0.0233452
114	0.0108167
115	0
116	0.0190263
117	0
118	0.0243516
119	0.0500899
120	0
121	0.0302655
122	0.0201246
123	0
124	0
125	0.0349285
126	0.060407
127	0.00632456
128	0.0316228
129	0.0504876
130	0.00943398
131	0.00728011
132	0.0327567
133	0.00141421
134	0.0172627
135	0.00360555
136	0.0067082
137	0.021587
138	0.00632456
139	0.0152971
140	0.0363456
141	0.00894427
142	0.0107703
143	0.0210238
144	0
145	0.00583095
146	0.0361386
147	0.0145602
148	0.002
149	0.0490918
150	0
151	0
152	0.00894427
res num	csp
